# Supplementary material for: Targeting circPTPN12/miR-21-5p/ΔNp63α pathway as a therapeutic strategy for human endometrial fibrosis
Source: bioRxiv preprint, doi:10.1101/2021.04.15.440082, version 1 (2021-04-16)
Supplement: Supplementary File 6 [file 440082_file07.docx]

Supplementary File 6. Mouse model grouping.

| Treatment | Groups |
| --- | --- |
| Mechanical injury alone | Sham-operation (*n* = 3)  Mechanically injured (*n* = 3) |
| Mechanical injury + circPTPN12 overexpression | Sham-operation (*n* = 4)  Mechanically injured + AAV-control (*n* = 4)  Mechanically injured + AAV-circPTPN12 (*n* = 4) |
| miR-21-5p replenishment | Sham-operation (*n* = 3)  Mechanically injured + AAV-circPTPN12 + agomir-NC (*n* = 3)  Mechanically injured + AAV-circPTPN12 + agomir-21-5p (*n* = 3) |
